# Supplementary material for: Selective adsorption of Pb( ii ) on green Sn-BDC-MOF/GO composite: optimization, DFT studies and mechanism
Source: Royal Society of Chemistry journal article supplement (doi:10.1039/d5ra04912a), 2025-01-01
Supplement: d5ra04912a1.pdf [file d5ra04912a1.pdf]

## Supplementary information

### Text S1

#### Characterization

Prepared samples were analyzed by Fourier transform-infrared spectra (FTIR, Shimadzu-8400S) to confirm their functional groups. The morphological changes were also made clear using a scanning electron microscope (SEM, JEOL JSM 6360 LA, Japan). To investigate the crystal phase was utilized X-ray Phillips diffractometer. Moreover, X-ray photoelectron spectroscopy (XPS, Thermo Scientific ESCALAB 250Xi VG, USA) was used to identify the elemental composition of the Sn-MOF/GO composite surface. The textural characteristics were investigated by using the Brunauer–Emmett–Teller method (BET-Beckman coulter, SA3100, USA). Variations of surface charges of Sn-MOF and Sn-MOF/GO composite were investigated by using Zeta-sizer (Malvern-UK).

**Table S1**

## Adsorption Isotherm equations

|                            |                                                                                                    |                                                                                                                                                                                                                                                                                                                                                                                                                                        |
|----------------------------|----------------------------------------------------------------------------------------------------|----------------------------------------------------------------------------------------------------------------------------------------------------------------------------------------------------------------------------------------------------------------------------------------------------------------------------------------------------------------------------------------------------------------------------------------|
| 1- Langmuir                | $\frac{C_e}{q_e} = \frac{1}{bq_m} + \frac{C_e}{q_m}$                                               | <p><b>Where</b></p> <p><math>q_e</math>: is the equilibrium adsorption capacity.</p> <p><math>q_m</math>: is the monolayer adsorption capacity.</p> <p><math>C_e</math>: is the residual concentration of <math>Pb^{2+}</math> at equilibrium.</p> <p><math>b</math>: is Langmuir constant.</p> <p><math>R_L</math>: is the separation factor calculated from <math>b</math> as follows:</p> $\left( R_L = \frac{1}{1 + bC_0} \right)$ |
| 2- Freundlich              | $\log q_e = \log K_F + \frac{1}{n} \log C_e$                                                       | $K_F$ and $n$ are Freundlich constants.                                                                                                                                                                                                                                                                                                                                                                                                |
| 3- Temkin                  | $q_e = B \ln A + B \ln C_e$ $B = \frac{RT}{b}$                                                     | <p><math>b</math>: is Temkin constant related to the heat of adsorption.</p> <p><math>A</math>: is the equilibrium binding constant.</p> <p><math>T</math>: is the absolute temperature.</p> <p><math>R</math>: is the gas constant. (8.314 J/mol.k).</p>                                                                                                                                                                              |
| Dubinin-Radushkevich (D-R) | $\ln q_e = \ln q_s - K_{ad} \varepsilon^2$ $\varepsilon = RT \ln \left( 1 + \frac{1}{C_e} \right)$ | <p><math>\varepsilon</math>: is the Polanyi potential.</p> <p><math>K_{ad}</math>: is a constant related to mean free energy of adsorption per mole of adsorbate.</p> <p><math>q_s</math>: is the saturation adsorption capacity</p>                                                                                                                                                                                                   |

**Table 2**

values of the separation factor  $R_L$

|       |       |       |       |       |
|-------|-------|-------|-------|-------|
| $C_o$ | 50    | 100   | 150   | 200   |
| $R_L$ | 0.114 | 0.061 | 0.041 | 0.031 |

**Table S3**

|                       |                                                                      |                                                                                                                                                                                                                     |
|-----------------------|----------------------------------------------------------------------|---------------------------------------------------------------------------------------------------------------------------------------------------------------------------------------------------------------------|
| Pseudo-first-order    | $\ln (q_e - q_t) = \ln q_e - k_1(t)$                                 | $q_e$ : is the amount of $Pb^{+2}$ that adsorbs onto Sn(II)-BDC MOF /GO composite at equilibrium.<br>$q_t$ : is the amount of $Pb^{+2}$ adsorption at time t.<br>$k_1$ : is the rate constant of pseudo first-order |
| Pseudo- second- order | $\frac{t}{q_t} = \frac{1}{k_2 q_e^2} + \frac{t}{q_e}$                | $k_2$ : is the rate constant pseudo-second-order.                                                                                                                                                                   |
| Elovich model         | $q_t = \frac{1}{\beta} \ln (\alpha \beta) + \frac{1}{\beta} \ln (t)$ | $\alpha$ : is Elovich coefficient that represents the initial adsorption rate.<br>$\beta$ : is Elovich coefficient that relates to the extent of surface coverage and activation energy for chemisorption.          |

Adsorption kinetics equations of different models

**Table S4**

Equations for thermodynamic parameters

|                                                          |                                                                                                                                                                                                                                                          |
|----------------------------------------------------------|----------------------------------------------------------------------------------------------------------------------------------------------------------------------------------------------------------------------------------------------------------|
| $\ln K_e = \frac{\Delta S^0}{R} - \frac{\Delta H^0}{RT}$ | <p><math>\Delta S^0</math> : is the change in entropy</p> <p><math>\Delta H^0</math> : is the change in enthalpy</p> <p><math>K_e</math>: is the thermodynamics equilibrium constant</p> <p>T: absolute temperature</p> <p>R: Universal gas constant</p> |
| $K_e = \frac{C_{Ae}}{C_e}$                               | <p><math>C_{Ae}</math> : is the concentration of <math>Pb^{2+}</math> on Sn-BDC-MOF/GO composite surface</p> <p><math>C_e</math> : is the concentration of <math>Pb^{2+}</math> at equilibrium</p>                                                       |
| $\Delta G^0 = \Delta H^0 - T\Delta S^0$                  | <p><math>\Delta G^0</math> : is the change in free energy</p>                                                                                                                                                                                            |

**Table S5**

Equations for distribution coefficient ( $K_d$ ) and relative selectivity factor ( $\alpha$ )

|                                                 |                                                                                                                                                                                                                                                                 |
|-------------------------------------------------|-----------------------------------------------------------------------------------------------------------------------------------------------------------------------------------------------------------------------------------------------------------------|
| $K_d = \frac{q_e}{C_e}$                         | <p><math>K_d</math> : is the distribution coefficient</p> <p><math>q_e</math>: is the is the amount of metal ions that adsorbs onto Sn(II)-BDC MOF /GO composite at equilibrium.</p> <p><math>C_e</math>: is the concentration of metal ions at equilibrium</p> |
| $\alpha = \frac{K_{d(Pb^{2+})}}{K_{d(M^{2+})}}$ | <p><math>\alpha</math>: is the ratio between the distribution coefficient of lead ions to distributions coefficient of other metals ions</p>                                                                                                                    |

**Fig. S1**

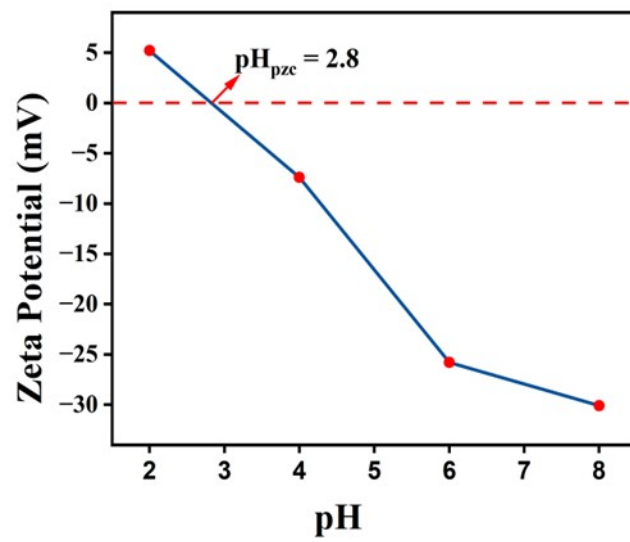

**Fig. S1** ZP of Sn-BDC-MOF/GO composite at different pH values.

Fig. S2

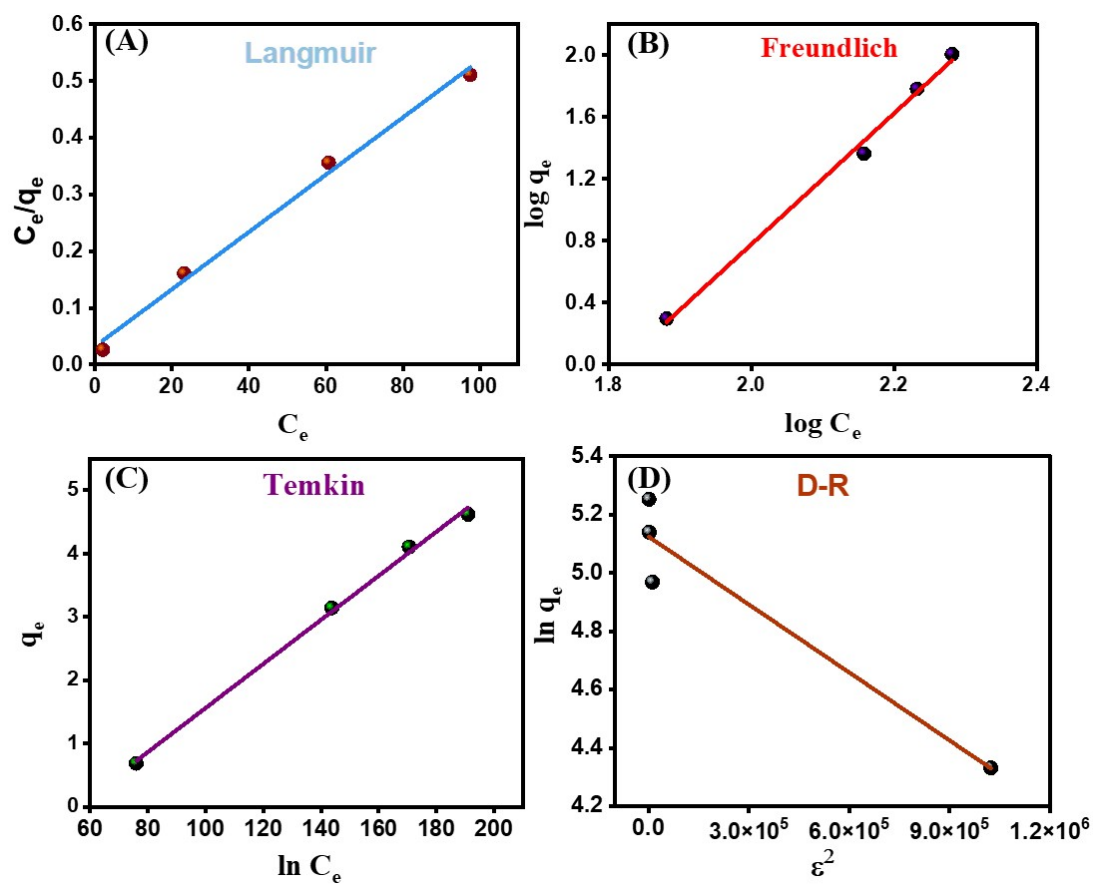

**Fig. S2** Adsorption isotherm models; (A) Langmuir, (B) Freundlich, (C) Temkin, (D) D-R for the adsorption Pb(II) by Sn-BDC MOF/Composite.



Fig.S3

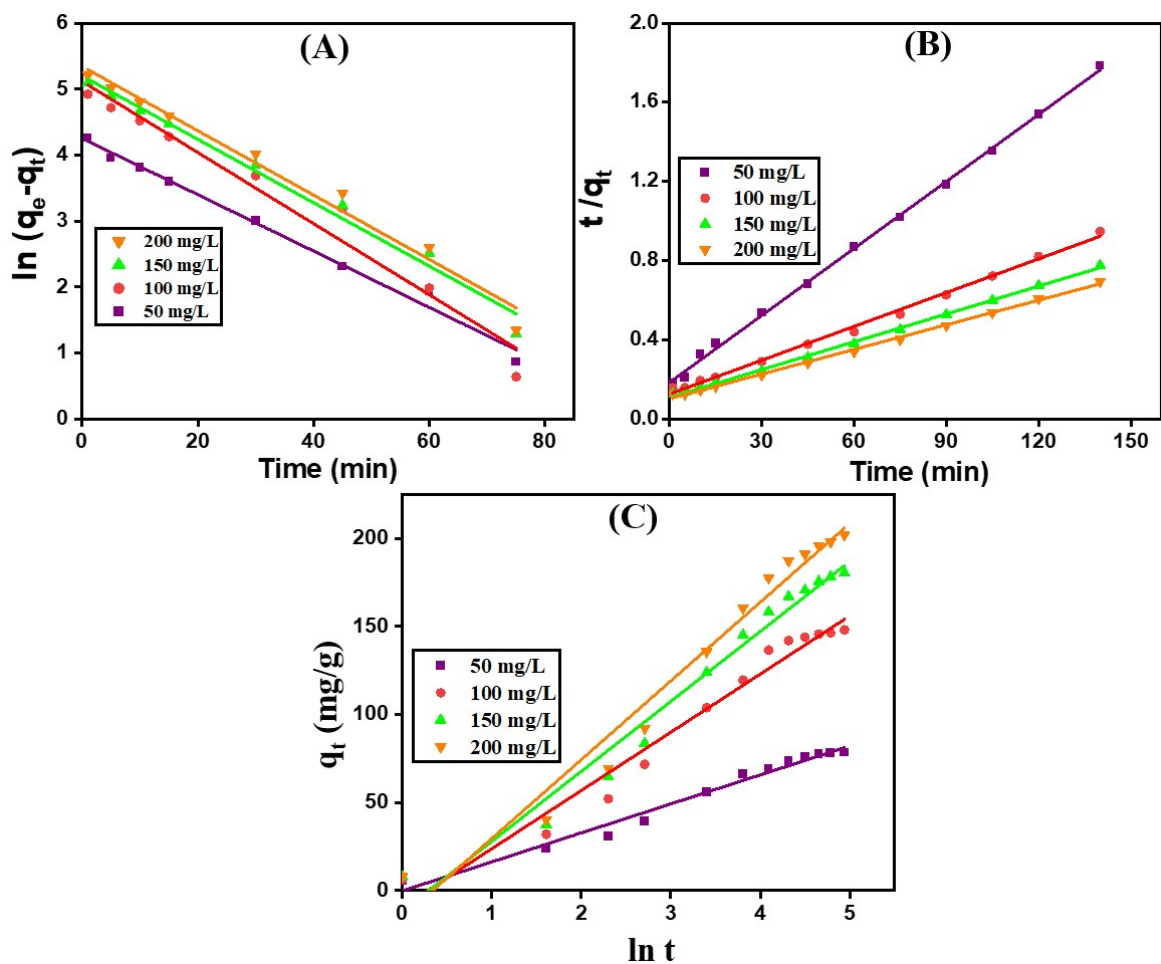

**Fig.S3** kinetics studies for the adsorption of Pb(II) ions by Sn-BDC MOF composite (A) Pseudo-First-order, (B) Pseudo-Second-order, and (C) Elovich
